1 **Small RNA signatures of the anterior cruciate ligament from patients with knee**  
2 **joint osteoarthritis**

3 Yalda A. Kharaz<sup>1,2</sup>, Yongxiang Fang<sup>3</sup>, Tim Welting<sup>4</sup>, Mandy Peffers<sup>1,2</sup> \*, Eithne J.  
4 Comerford<sup>1,2,5</sup> \*

5

6 <sup>1</sup>Department of Musculoskeletal Biology I, Institute of Life Course and Medical  
7 Sciences, University of Liverpool, William Duncan Building, Liverpool, UK

8 <sup>2</sup>The MRC-Arthritis Research UK Centre for Integrated Research into Musculoskeletal  
9 Ageing (CIMA), Liverpool, UK

10 <sup>3</sup>Centre for Genomic Research, Institute of Integrative Biology, Biosciences Building,  
11 Crown Street, University of Liverpool, Liverpool L69 7ZB, UK

12 <sup>4</sup>Department of Orthopaedic Surgery, Maastricht University Medical Centre, 6202 AZ  
13 Maastricht, The Netherlands

14 <sup>5</sup>Institute of Veterinary and Ecological Sciences, Leahurst Campus, University of  
15 Liverpool, Neston, UK

16

17 \*Correspondence to: Yalda Ashraf Kharaz

18 Tel: 0151 7956100 Email: Y. Ashraf-Kharaz@liverpool.ac.uk

19 Department of Musculoskeletal Biology I, Institute of Ageing and Chronic Disease, 6  
20 West Derby Street, Liverpool, L7 8TX

21

22

23 \* These authors have contributed equally to this manuscript.

24

25 Keywords: snoRNAs, microRNAs, anterior cruciate ligament, osteoarthritis and small  
26 non-coding RNAs

27

## 28 **ABSTRACT**

29 The anterior cruciate ligaments are susceptible to degeneration, resulting in pain,  
30 reduced mobility and development of the degenerative joint disease osteoarthritis.  
31 There is currently a paucity of knowledge on how anterior cruciate ligament  
32 degeneration and disease can lead to osteoarthritis. Small non-coding RNAs  
33 (sncRNAs), such as microRNAs, and small nucleolar RNA, are important regulators  
34 of gene expression. We aimed to identify sncRNA profiles of human anterior cruciate  
35 ligaments to provide novel insights into their roles in osteoarthritis.

36 RNA was extracted from the anterior cruciate ligaments of non-osteoarthritic knee  
37 joints (control) and end-stage osteoarthritis knee joints, used for small RNA  
38 sequencing and significantly differentially expressed sncRNAs defined. Bioinformatic  
39 analysis was undertaken on the differentially expressed miRNAs and their putative  
40 target mRNAs to investigate pathways and biological processes affected.

41 Our analysis identified 184 sncRNA that were differentially expressed between control  
42 ACLs derived from osteoarthritic joints with a false discovery adjusted p value<0.05;  
43 68 small nucleolar RNAs, 26 small nuclear RNAs and 90 microRNAs. We identified  
44 both novel and previously identified (miR-206, -101, -365 and -29b and -29c)  
45 osteoarthritis-related microRNAs and other sncRNAs (including SNORD74,  
46 SNORD114, SNORD72) differentially expressed in ligaments derived from  
47 osteoarthritic joints. Significant cellular functions deduced by the differentially

48 expressed miRNAs included differentiation of muscle ( $P < 0.001$ ), inflammation  
49 ( $P < 1.42E-10$ ), proliferation of chondrocytes ( $P < 0.03$ ), fibrosis ( $P < 0.001$ ) and cell  
50 viability ( $P < 0.03$ ). Putative mRNAs were associated with the canonical pathways  
51 'Hepatic Fibrosis Signalling' ( $P < 3.7E-32$ ), and 'Osteoarthritis' ( $P < 2.2E-23$ ). Biological  
52 processes included apoptosis ( $P < 1.7E-85$ ), fibrosis ( $P < 1.2E-79$ ), inflammation  
53 ( $P < 3.4E-88$ ), necrosis ( $P < 7.2E-88$ ) and angiogenesis ( $P < 5.7E-101$ ).

54 SncRNAs are important regulators of anterior cruciate disease during osteoarthritis  
55 and may be used as therapeutic targets to prevent and manage anterior cruciate  
56 ligament disease and the resultant osteoarthritis.

57

58

## 59 **INTRODUCTION**

60 Ligaments are resilient connective tissues essential for bone-to-bone connections  
61 within joints [1]. The anterior cruciate ligament (ACL) is the most commonly damaged  
62 ligament [2] with an incidence of approximately 68.6 ACL ruptures per 100,000 people  
63 [3] resulting in considerable social and economic costs [4, 5]. In the USA alone, there  
64 are approximately 100,000-175,000 ACLs surgeries per year, with cost exceeding of  
65 2 billion dollars [6, 7]. ACL injuries can also lead to significant functional impairment in  
66 athletes, muscle atrophy and weakness, joint instability, meniscal lesions, and are  
67 associated with development of osteoarthritis (OA) [8, 9]. In the case of the knee joint,  
68 more than 50% of ACL injury patients eventually develop OA with the degree and  
69 progression of disease being accelerated in these cases [10, 11]. Reports  
70 demonstrate that there is an association between ACL degeneration and subsequent  
71 knee OA, suggesting the importance of ACL degradation in OA pathogenesis [12].

72

73 There is currently substantial interest in the area of epigenetic regulation in ageing,  
74 disease, and repair mechanisms in musculoskeletal tissues such as muscle [13, 14],  
75 cartilage [15, 16], tendon [17, 18] and ligament [19, 20]. Epigenetics is the study of  
76 changes in gene expression that do not derive from changes to the genetic code itself  
77 [21]. Insufficient exploration of the epigenetic changes in diseased ACL has been  
78 undertaken. One class of epigenetic molecules are small non-coding RNAs (sncRNAs)  
79 which include microRNAs (miRNAs or miRs), small nucleolar RNAs (snoRNAs) and  
80 small nuclear RNAs (snRNAs) These are functional RNA molecules that are  
81 transcribed from DNA but do not translate into proteins and are emerging as important  
82 regulators of gene expression before and after protein transcription. Their aberrant  
83 expression profiles in musculoskeletal conditions such as ACL injury are expected to  
84 be associated with cellular dysfunction and disease development [22]. We have  
85 previously identified changes in the sncRNA profiles in ageing and OA human and  
86 equine cartilage [16, 23, 24], ageing human and equine tendon [25, 26] and ageing  
87 and OA murine joints and serum [27]. Identifying sncRNAs associated with ACL  
88 degradation and comprehending their role in OA could have an enormous impact on  
89 the understanding of its pathogenesis and future management.

90

91 To date, little is known about the sncRNA changes in diseased ACL. We hypothesise  
92 that sncRNA expression is altered in ACLs derived from OA joints and that their  
93 identification may elucidate the underlying mechanisms of ACL degeneration. This  
94 information could then provide potential diagnostic markers and enable future  
95 therapeutic targets to treat ACL degeneration, facilitating prompt positive intervention  
96 in the associated development of OA.

97

## 98 **MATERIALS AND METHODS**

99 All reagents were from ThermoFisher Scientific, unless otherwise stated.

### 100 **Sample collection**

101 ACLs from non-OA, apparently healthy knee joints (control) (n=4) were obtained from  
102 a commercial biobank (Articular Engineering). Ethical approval for the purchase  
103 human ACL tissue was granted by the Central University Research Ethics Committee  
104 C, University of Liverpool (RETH4721). Diseased OA ACLs were obtained from the  
105 knee joints of patients undergoing total knee arthroplasty for end-stage OA treatment  
106 (n=4). Fully informed patient consent was given for the use of these samples under  
107 the institutional ethical approval (Maastricht University Medical Centre approval IDs:  
108 MUMC 2017-0183). Samples were collected in RNAlater and stored at -80°C until  
109 used.

110

### 111 **RNA extraction**

112 RNA was extracted from ACL tissues once pulverised into a powder with a  
113 dismembranator (Mikro-S, Sartorius, Melsungen, Germany) under liquid nitrogen.  
114 Total RNA was extracted using the miRNeasy kit (Qiagen, Manchester, UK) according  
115 to the manufacturer's instructions. The RNA samples were quantified using a  
116 Nanodrop spectrophotometer (NanoDrop Technologies, Wilmington, USA). The  
117 integrity of the RNA was assessed on the Agilent 2100 Bioanalyzer (Agilent, Stockport,  
118 UK) using an RNA Pico chip (Agilent, Stockport, UK).

119

## 120 **Small RNA-Sequencing analysis: cDNA library preparation and sequencing**

121 1000ng RNA per sample was submitted for library preparation using NEBNext® Small  
122 RNA Library Prep Set for Illumina (New England Biosciences (NEB), Ipswich, USA)  
123 but with the addition of a Cap-Clip™ Acid Pyrophosphatase (Cell script, Madison,  
124 USA) step to remove any 5' cap structures on some snoRNAs [27] and size selected  
125 using a range 120-300bp (including adapters). This enabled both miRNAs and  
126 snoRNAs to be identified using a non-biased approach. The pooled libraries were  
127 sequenced on an Illumina HiSeq4000 platform with version 1 chemistry to generate 2  
128 x 150 bp paired-end reads.

129

## 130 **Data processing**

131 Sequence data were processed through a number of steps to obtain non-coding RNA  
132 expression values including; basecalling and de-multiplexing of indexed reads using  
133 CASAVA version 1.8.2; adapter and quality trimming using Cutadapt version 1.2.1 [28]  
134 and Sickle version 1.200 to obtain fastq files of trimmed reads; aligning reads to human  
135 genome reference sequences (release 95) from Ensembl using Tophat version 2.0.10  
136 [29] with option “-g 1”; counting aligned reads using HTSeq-count [30] against the  
137 features defined in human genome GTF file (release 95). The features whose biotype  
138 belonged to the gene categories such as miRNA, snoRNA, and snRNA were  
139 extracted.

140 Differential expression (DE) analysis was performed in R using package DESeq2 [31].

141 The processes and technical details of the analysis include; assessing data variation  
142 and detecting outlier samples through comparing variations of within and between

143 sample groups using principle component analysis (PCA) and correlation analysis;  
144 handling library size variation using DESeq2 default method; formulating data variation  
145 using negative binomial distributions; modelling data using a generalised linear model;  
146 computing log fold change (logFC) values for control versus OA ACLs based on model  
147 fitting results through contrast fitting approach, evaluating the significance of estimated  
148 logFC values by Wald test; adjusting the effects of multiple tests using false discovery  
149 rate (FDR) [32] approach to obtain FDR adjusted P-values.

150

### 151 **Pathway analysis of differentially expressed miRNAs and their predicted targets**

152 Potential biological associations of the DE miRNAs in OA ACL were identified using  
153 Ingenuity Pathway Analysis (IPA) (IPA, Qiagen Redwood City, USA) 'Core Analysis'.  
154 Additionally in order to identify putative miRNA targets, bioinformatic analysis was  
155 performed by uploading DE miRNA data into the MicroRNA Target Filter module within  
156 IPA. This identifies experimentally validated miRNA-mRNA interactions from TarBase,  
157 miRecords, and the peer-reviewed biomedical literature, as well as predicted miRNA-  
158 mRNA interactions from TargetScan. We applied a conservative filter at this point,  
159 using only experimentally validated and highly conserved predicted mRNA targets for  
160 each miRNA. Targets were also filtered on the cells fibroblasts and mesenchymal stem  
161 cells (as these were closest to potential cell types within ligament). 'Core Analysis' was  
162 then performed in IPA on the filtered mRNA target genes and their associated  
163 miRNAs. For each core analysis canonical pathways, novel networks, diseases and  
164 functions, and common upstream regulators were queried.

165

166 Additionally TOPP Gene [33] was used for overrepresentation analysis of the mRNA  
167 targets from Target Filter using Fisher's Exact test with FDR correction. This tests  
168 whether the input mRNAs associate significantly with specific pathways and generates  
169 a list of biological process gene ontology (GO) terms. Terms with FDR adjusted  $P <$   
170 0.05 were summarised using REViGO [34] with allowed similarity of 0.4 and visualised  
171 using Cytoscape [35].

172

### 173 **Statistical analysis**

174 The heatmap, volcano and principle component analysis (PCA) plots were made  
175 using MetaboAnalyst 3.5 (<http://www.metaboanalyst.ca>) which uses the R package of  
176 statistical computing software.30 [36].

177

## 178 **RESULTS**

### 179 **Sample assessment**

180 The ages of the control group (age, mean  $\pm$  standard deviation ( $48 \pm 2.16$ )) and ACLs  
181 derived from OA joints ( $74.7 \pm 5.42$ ) were significantly different ( $p < 0.05$ )  
182 (Supplementary Figure 1). Summary of all donors' information is provided in  
183 Supplementary Table 1.

184

### 185 **Analysis of small RNA sequencing data**

186 We identified a total 590 miRNAs, 226 snoRNAs and 100 small nuclear (snRNAs) in  
187 the samples (with greater than 10 counts per million (CPM) in each samples). There  
188 were 184 differentially expressed sncRNAs identified ( $FDR < 0.05$ ) and at least 10 CPM  
189 in each sample. The categories of RNA identified are in Figure 1A and included



190 miRNAs, snoRNAs and small nuclear RNAs (snRNAs). PCA revealed that the ACLs  
191 derived from non-OA joints (control) were clustered together and could be clearly  
192 separated from the ACLs derived from OA knee joints (Figure 1B).

193

194 Of the 184 snRNAs there were 68 DE snoRNAs (64 reduced in OA and 4 increased  
195 in OA), 26 DE snRNAs (24 reduced in OA and 2 increased in OA) and 90 DE miRNAs  
196 (43 reduced in OA and 47 increased in OA) (FDR<0.05 and greater than 10 CPM in  
197 all samples) (Figure 1C, Supplementary Table 2). The most DE miRNAs are in Table  
198 1, with snRNA and snoRNAs in Table 2. We further generated a heatmap of the DE  
199 sncRNAs for miRNAs (Figure 1D) and snRNAs and snoRNAs (Supplementary Figure  
200 2).

201

## 202 **Pathway analysis of differentially expressed miRNAs**

203 To explore potential biological associations of the 90 DE miRNAs in ACLs derived from  
204 OA knee joints we undertook an IPA 'Core Analysis'. Network-eligible molecules were  
205 overlaid onto molecular networks based on information from Ingenuity Pathway  
206 Knowledge Database. Networks were then generated based on connectivity.  
207 Interesting features were determined from the gene networks inferred. Significant  
208 cellular functions deduced by the DE miRNAs included differentiation of muscle  
209 (P<0.001), inflammation (P<1.42E-10), proliferation of chondrocytes (P<0.03), fibrosis  
210 (P<0.001) and cell viability (P<0.03) (Figure 2A). The top scoring network identified  
211 was 'Organismal Injury and Abnormalities' (score 43) and included OA-related  
212 miRNAs such as miR-206, miR-101, let-7f, miR-455, miR-29b and miR-29c (Figure  
213 2B).

214

## 215 **Pathway analysis on target mRNA genes of the differentially expressed miRNAs**

216 Next, we undertook analysis to determine the mRNA targets of the DE miRNAs. 90  
217 miRNAs that were DE in ACLs derived from OA knee joints compared to controls were  
218 initially input into MicroRNA Target Filter. Once a conservative filter was applied (only  
219 miRNAs with experimental or highly predicted targets), 529 mRNAs were putative  
220 targets (Supplementary Table 3). These mRNAs were then input into IPA core analysis  
221 and all results summarised in Supplementary Table 3. The top canonical pathways for  
222 target mRNAs of DE miRNAs in OA ACL are in Table 3. Two of the most significant of  
223 which were the osteoarthritis pathway ( $P < 2.3E-23$ ) and hepatic fibrosis ( $P < 3.1E-32$ )  
224 (Figure 3). The most significant upstream regulators of these mRNAs included tumour  
225 necrosis factor ( $P < 1.3E-101$ ) and transforming growth factor  $\beta$  (TGF $\beta$ ) ( $P < 8.5E-83$ )  
226 (Table 4). Upstream regulators represent molecules that may be responsible for the  
227 putative mRNAs in our dataset and cover the gamut of molecule types found in the  
228 literature, from transcription factors, to cytokines, chemicals and drugs. The most  
229 significant diseases and biological functions identified are shown in Table 5. The top  
230 networks identified are in Supplementary Table 3. The network 'cellular development,  
231 movement and genes expression' (score 41) (Figure 4A) was overlaid with significant  
232 biological processes including apoptosis ( $P < 1.7E-85$ ), fibrosis ( $P < 1.2E-79$ ),  
233 inflammation ( $P < 3.4E-88$ ), and necrosis ( $P < 7.2E-88$ ). The network 'inflammatory  
234 disease' (score 35) (Figure 4B) shows pertinent significant biological processes  
235 including organisation of collagen fibrils ( $P < 3.7E-07$ ), fibrosis ( $P < 2.6E-14$ ), rheumatoid  
236 arthritis ( $P < 3.6E-06$ ), angiogenesis ( $P < 8.9E-09$ ), differentiation of bone ( $P < 5E-06$ ),  
237 inflammation of the joint ( $P < 8.8E-07$ ) and cartilage development ( $1.5E-07$ ).

238

239 To obtain an overview of pathways that the putative target mRNAs were involved in  
240 the mRNAs derived from IPA were also input into the gene ontology (GO) tool TOPP  
241 Gene and the biological processes summarised in REViGO and visualised using  
242 Cytoscape (Figure 5 and Supplementary Table 4).

243

244

## 245 **DISCUSSION**

246 The global prevalence of knee OA is currently 5% and is projected to rise with an  
247 increase in the ageing population [37]. Reports propose that there is an association  
248 between ACL degeneration and subsequent knee OA, suggesting the importance of  
249 ACL degradation and regeneration molecular mechanisms in OA pathogenesis [38].  
250 There is also a strong correlation between ACL degeneration and subsequent knee  
251 OA [12]. One potential mechanism capable of regulating global alterations to a  
252 particular tissue is modification of sncRNA expression. To begin to elucidate the role  
253 that they play in the global changes observed in the ACL during OA and understand  
254 further the potential role of the ACL in arthritis, we undertook a non-biased approach  
255 small RNA sequencing of ACLs from OA knee joints and compared these to our control  
256 samples derived from non-OA knee joints. Whilst a study previously demonstrated DE  
257 miRNAs in ACL [20], this is the first time that, to our knowledge, small RNA sequencing  
258 has been used to interrogate both snoRNAs and miRNAs in an unbiased manner and  
259 we identified unique OA dependant signatures.

260

261 There were 68 snoRNAs, 26 snRNAs and 90 miRNAs significantly different in ACLs  
262 derived from OA knee joints and the OA status of the donor accounted for the principal  
263 variability in the data. Additional bioinformatics was performed, to analyse the

264 biological processes and pathways affected by the differentially expressed miRNAs  
265 and in addition, the putative mRNA targets of the differentially expressed miRNAs,  
266 enhancing our understanding of the roles of the dysregulated miRNAs in OA  
267 pathogenesis.

268

269 Several of DE miRNAs found in this study, including miR-29b, miR -335, let-7f, miR-  
270 424, and miR-941 correlate to previously altered miRNAs in a study comparing  
271 ruptured ACLs to diseased OA ACLs [20]. These miRNAs were found to be correlated  
272 with cartilage development and remodelling, extracellular matrix homeostasis and  
273 inflammatory response [20]. We have found other miRNAs associated with OA  
274 including miR-206, miR-101, miR365, miR-29b and miR-29c, whose expression  
275 altered in ACLs derived from OA joints [39-41]. Pathways identified by the DE miRNAs  
276 with known functions in OA in other tissues included inflammation [42], proliferation of  
277 chondrocytes [43], and fibrosis [44]. Canonical pathways identified have roles in OA  
278 pathogenesis including senescence [45], fibrosis, TGF $\beta$  signalling [46], retinoic acid  
279 binding protein (RAR) activation [47] and peroxisome proliferator-activated  
280 receptor/retinoid X receptor (PPAR/RXR) activation [48, 49].

281

282 To address the roles of miRNAs in diseased OA ACLs, their mRNA target genes  
283 should also be taken into consideration. Therefore, in order to determine potential  
284 mRNA targets of the DE miRNAs we used Target Filter in IPA to identify predicted  
285 mRNA targets. We used conservative filters for the mRNAs identified by only choosing  
286 highly conserved predicted mRNA targets for each miRNA and by choosing relevant  
287 cell types to ACL tissue. We then undertook GO analysis and visualisation of the  
288 significant biological processes effected with online tools. Using ToppGene, Revigo

289 and Cytoscape for visualisation, we showed an overview of the essential biological  
290 processes these mRNA target genes were involved in, including extracellular matrix  
291 organisation, epigenetic regulation, cell signalling, cell growth and proliferation. In IPA,  
292 additional functions affected by these genes, known to have a role in OA pathogenesis  
293 and therefore with a potential role in OA ACLs were highlighted including apoptosis  
294 [50], fibrosis [44], inflammation of the joint [42], necrosis [51], organisation of collagen  
295 fibrils [12], angiogenesis [52], differentiation of bone [53] and cartilage development  
296 [54]. Canonical pathway analysis was also performed. We found that many pathways  
297 enriched by the putative target genes were essential for OA pathogenesis, including  
298 the 'osteoarthritis pathway'. The significant mRNA targets in this pathway included  
299 those involved in inflammation (TNF, IL1, IL8), Wnt signalling (WNT3A, Frizzled,  
300 TCF/LEF), TGF $\beta$  and SMAD signalling (TGF $\beta$ R2, SMAD1, -4, -5, -8), hypoxia (HIF1 $\alpha$ ),  
301 and mammalian target of rapamycin signalling (MTOR). Additionally downstream  
302 targets of these signalling pathways with known roles in OA pathogenesis were  
303 identified and included matrix metalloproteinase-3 [55], tissue inhibitor of  
304 metalloproteinase-3 [56], and collagen X  $\alpha$ 1 [57]. These findings indicate the potential  
305 importance of these pathways in ACL degeneration associated with OA. Hepatic  
306 fibrosis was the most significant canonical pathway identified from the putative  
307 mRNAs together with the DE miRNAs in our study. Synovial fibrosis is often found in  
308 OA [44] and fibrosis has previously been described in OA joints following ACL injury  
309 [58]. Furthermore TGF $\beta$ , one of the most significant upstream regulator in our mRNA  
310 target gene analysis, is the master regulator of fibrosis [57]. Many TGF $\beta$ -related genes  
311 including TGF $\beta$ 2, TGF $\beta$ 3, TGF $\beta$ R1, TGF $\beta$ R2 and TGF $\beta$ R3 were predicted targets of  
312 the DE miRNAs including miR-98-5p, miR-101-3p, miR-128-5p, miR-136-3p, miR-17-  
313 5p; strongly implicating it in the fibrosis evident in the diseased ACLs in OA.

314

315 Another class of snRNAs, snoRNAs, were altered in the OA ACLs in our study. This  
316 conserved class of non-coding RNAs are principally characterised as guiding site-  
317 specific post-transcriptional modifications in ribosomal RNA [59]. Furthermore  
318 snoRNAs can modify and/or interact with additional classes of RNAs including other  
319 snoRNAs, transfer RNAs and mRNAs [60]. A reliable modification site has been  
320 assigned to 83% of the canonical snoRNAs, with 76 snoRNAs described as orphan,  
321 meaning they act in an unknown or unique manner [61]. Novel functions reported for  
322 snoRNAs including the modulation of alternative splicing [62], involvement in stress  
323 response pathways, [63] and the modulation of mRNA 3'end processing [64]. Like  
324 miRNAs, snoRNAs are emerging as important regulators of cellular function and  
325 disease development [65], in part due to their ability to fine-tune the ribosome to  
326 accommodate changing requirements for protein production during development,  
327 normal function and disease [66] .

328

329 We have previously identified a role for snoRNAs in cartilage ageing and OA [24] and  
330 their potential use as biomarkers for OA [27]. Furthermore, others identified that the  
331 snoRNAs, SNORD38 and SNORD48, are significantly elevated in the serum of  
332 patients developing cartilage damage a year following ACL injury and serum levels of  
333 SNORD38 were greatly elevated in patients who develop cartilage damage after ACL  
334 injury suggesting SNORD38 as a serum biomarker for early cartilage damage [67]

335

336 Interestingly, we found an increase in SNORD113 and SNORD114 in diseased OA  
337 ACLs. These snoRNAs are located in imprinted human loci and may play a role in the  
338 evolution and/or mechanism of epigenetic imprinting [61]. They belong to the C/D box

339 class of snoRNAs and most of the members of the box C/D family direct site-specific  
340 2'-O-methylation of substrate RNAs. However, SNORD113 and SNORD114 differ  
341 from C/D box snoRNAs in their tissue specific expression profiles (including in  
342 fibroblasts, osteoblasts and chondrocytes [61] and the lack of complementarity to any  
343 RNA. As a result, they are not predicted to guide to 2'O-methylation but have novel,  
344 unknown roles [61]. Additionally SNORD113-1 functions as a tumour suppressor in  
345 hepatic cell carcinoma by reducing cell growth and inactivating the phosphorylation of  
346 ERK1/2 and SMAD2/3 in MAPK/ERK and TGF- $\beta$  pathways [68]. We have previously  
347 identified that SNORD113-1 is also increased in OA human knee cartilage but  
348 reduced in ageing human knee cartilage, whilst SNORD114 increases in OA knee  
349 cartilage [24].

350

351 SNORD72 was increased in diseased OA ACLs. In hepatocellular carcinoma, the  
352 overexpression of SNORD72 was found to enhance cell proliferation, colony formation  
353 and invasion by stabilising Inhibitor of differentiation (ID) genes which are a basic helix-  
354 loop-helix (bHLH) transcription factors [69]. The ID family genes have been shown to  
355 play a role in cell proliferation and angiogenesis [70]. The lack of a DNA binding  
356 domain, results in inhibition of the binding of other transcription factors to DNA in a  
357 dominant negative fashion [71]. The expression of some members of this family in  
358 rheumatoid arthritis synovium suggests they may have a role in human inflammatory  
359 disease [72]. Whilst the downstream signalling of snoRNAs is principally  
360 unknown, snoRNAs regulate ribosome biogenesis [73]. However a subclass of  
361 orphans do not have complimentary RNA sequences [74]. Mao Chet et al., found that  
362 ribosome biogenesis was not affected following SNORD72 overexpression implying  
363 it exerts functionality in other ways [69]. Therefore whilst some snoRNAs can regulate

364 the expression of RNAs [75], others can reduce the gene stability [74] or directly  
365 activate or suppress enzymes [76]. Together our snoRNA findings indicate that  
366 changes in ACL snoRNA expression could have important implications in knee OA  
367 through both canonical and non-canonical roles.

368

369 Our study has a number of limitations due to availability of human ACL tissue. There  
370 was also a mild imbalance between the sexes in the two groups with most of the OA  
371 derived ACLs coming from males but all the control group being sourced from females.  
372 In human tendon, we have previously demonstrated that males and females are  
373 transcriptionally different and gene expression in aged cells moves in opposite  
374 directions [26]. Ligament degeneration has also been demonstrated to be influenced  
375 by lower concentrations of sex hormones in young female athletes [77]. Macroscopic  
376 grading of tissues were not performed due to limited images of diseased OA ACL  
377 samples, however images of control samples demonstrated healthy knee joint  
378 cartilage with no signs of ACL degeneration. Finally, there were age discrepancies  
379 between the two groups and so we cannot discount an age effect on sncRNAs  
380 expression.

381

382 In conclusion, our study revealed alterations in a number of classes of snRNAs in ACL  
383 tissues derived from patients with knee OA compared to apparently healthy ACLs from  
384 non-OA joints. Our functional bioinformatic analyses suggests that the dysregulated  
385 miRNAs may regulate cartilage development and remodelling, collagen biosynthesis  
386 and degradation, ECM homeostasis and pathology by interacting with their targets.  
387 Uniquely we also demonstrate that snoRNAs may also have a role in ACL



388 degeneration. Collectively, our study provides novel insight into the ACL related  
389 sncRNA dysregulation in patients with OA.

390

### 391 **Competing interests**

392 The authors declare no competing interests.

393

### 394 **Acknowledgement**

395 Mandy Peffers funded through a Wellcome Trust Intermediate Clinical Fellowship  
396 (107471/Z/15/Z). This work was also supported by Institute of Ageing and Chronic  
397 disease (Comerford) and by the MRC and Versus Arthritis as part of the Medical  
398 Research Council Versus Arthritis Centre for Integrated Research into  
399 Musculoskeletal Ageing (CIMA) [MR/R502182/1]. The MRC Versus Arthritis Centre for  
400 Integrated Research into Musculoskeletal Ageing is a collaboration between the  
401 Universities of Liverpool, Sheffield and Newcastle. The authors would like to  
402 acknowledge, Dr Pieter Emans, Maastricht University Orthopaedic surgeon for  
403 collating OA diseased samples.

404

### 405 **Authors' contributions**

406 MP, EC and YAK designed and coordinated the study. TW collected the samples.  
407 YF processed the samples for small RNA sequencing. MP and YA conducted the  
408 statistical analysis and drafted the manuscript. All authors revised the draft critically  
409 read and approved the final submitted manuscript.

410

411

412

413 **References**

- 414 1. Rumian, A.P., A.L. Wallace, and H.L. Birch, *Tendons and ligaments are*  
415 *anatomically distinct but overlap in molecular and morphological features—a*  
416 *comparative study in an ovine model*. *Journal of orthopaedic research*, 2007.  
417 **25**(4): p. 458-464.
- 418 2. Woo, S.L.Y., et al., *Injury and Repair of Ligaments and Tendons*. *Annual*  
419 *Review of Biomedical Engineering*, 2000. **2**(1): p. 83-118.
- 420 3. Gianotti, S.M., et al., *Incidence of anterior cruciate ligament injury and other*  
421 *knee ligament injuries: A national population-based study*. *Journal of Science*  
422 *and Medicine in Sport*, 2009. **12**(6): p. 622-627.
- 423 4. Robling, M.R., et al., *Time to talk? Patient experiences of waiting for clinical*  
424 *management of knee injuries*. *Quality and Safety in Health Care*, 2009. **18**(2):  
425 p. 141-146.
- 426 5. Cumps, E., et al., *Injury rate and socioeconomic costs resulting from sports*  
427 *injuries in Flanders: data derived from sports insurance statistics 2003*. *British*  
428 *journal of sports medicine*, 2008. **42**(9): p. 767-772.
- 429 6. Ali, N. and G. Rouhi, *Barriers to predicting the mechanisms and risk factors of*  
430 *non-contact anterior cruciate ligament injury*. *The open biomedical*  
431 *engineering journal*, 2010. **4**: p. 178.
- 432 7. Griffin, L.Y., et al., *Noncontact anterior cruciate ligament injuries: risk factors*  
433 *and prevention strategies*. *JAAOS-Journal of the American Academy of*  
434 *Orthopaedic Surgeons*, 2000. **8**(3): p. 141-150.
- 435 8. Kiapour, A. and M. Murray, *Basic science of anterior cruciate ligament injury*  
436 *and repair*. *Bone and Joint Research*, 2014. **3**(2): p. 20-31.
- 437 9. Wurtzel, C.N., et al., *Pharmacological inhibition of myostatin protects against*  
438 *skeletal muscle atrophy and weakness after anterior cruciate ligament tear*.  
439 *Journal of Orthopaedic Research*, 2017.
- 440 10. Driban, J.B., et al., *Association of knee injuries with accelerated knee*  
441 *osteoarthritis progression: data from the Osteoarthritis Initiative*. *Arthritis care*  
442 *& research*, 2014. **66**(11): p. 1673-1679.
- 443 11. Barenus, B., et al., *Increased risk of osteoarthritis after anterior cruciate*  
444 *ligament reconstruction: a 14-year follow-up study of a randomized controlled*  
445 *trial*. *The American journal of sports medicine*, 2014. **42**(5): p. 1049-1057.
- 446 12. Hasegawa, A., et al., *Anterior cruciate ligament changes in the human knee*  
447 *joint in aging and osteoarthritis*. *Arthritis & Rheumatism*, 2012. **64**(3): p. 696-  
448 704.
- 449 13. Soriano-Arroquia, A., et al., *The functional consequences of age-related*  
450 *changes in microRNA expression in skeletal muscle*. *Biogerontology*, 2016.  
451 **17**(3): p. 641-654.

- 452 14. Goljanek-Whysall, K., D. Sweetman, and A.E. Münsterberg, *microRNAs in*  
453 *skeletal muscle differentiation and disease*. Clinical science, 2012. **123**(11): p.  
454 611-625.
- 455 15. Peffers, M., et al., *BIG tasks for small RNAs; a new class of rnas in the*  
456 *pathogenesis of osteoarthritis*. Osteoarthritis and Cartilage, 2016. **24**: p. S372.
- 457 16. Balaskas, P., et al., *MicroRNA Profiling in Cartilage Ageing*. International  
458 journal of genomics, 2017. **2017**.
- 459 17. Millar, N.L., et al., *MicroRNA29a regulates IL-33-mediated tissue remodelling*  
460 *in tendon disease*. Nature communications, 2015. **6**: p. 6774.
- 461 18. Watts, A.E., et al., *MicroRNA29a treatment improves early tendon injury*.  
462 Molecular Therapy, 2017. **25**(10): p. 2415-2426.
- 463 19. Xu, C., et al., *Integrated microRNA-mRNA analyses reveal OPLL specific*  
464 *microRNA regulatory network using high-throughput sequencing*. Scientific  
465 reports, 2016. **6**: p. 21580.
- 466 20. Li, B., et al., *Identification of differentially expressed microRNAs in knee*  
467 *anterior cruciate ligament tissues surgically removed from patients with*  
468 *osteoarthritis*. International journal of molecular medicine, 2017. **40**(4): p.  
469 1105-1113.
- 470 21. Barter, M., C. Bui, and D. Young, *Epigenetic mechanisms in cartilage and*  
471 *osteoarthritis: DNA methylation, histone modifications and microRNAs*.  
472 Osteoarthritis and cartilage, 2012. **20**(5): p. 339-349.
- 473 22. Choudhuri, S., *Small noncoding RNAs: biogenesis, function, and emerging*  
474 *significance in toxicology*. J Biochem Mol Toxicol, 2010. **24**(3): p. 195-216.
- 475 23. Peffers, M.J., X. Liu, and P.D. Clegg, *Transcriptomic signatures in cartilage*  
476 *ageing*. Arthritis research & therapy, 2013. **15**(4): p. R98.
- 477 24. Peffers, M.J., et al., *snoRNA signatures in cartilage ageing and osteoarthritis*.  
478 Osteoarthritis and Cartilage, 2018. **26**: p. S164.
- 479 25. Peffers, M.J., et al., *Transcriptome analysis of ageing in uninjured human*  
480 *Achilles tendon*. Arthritis Res Ther, 2015. **17**: p. 33.
- 481 26. Pease, L.I., et al., *Cross platform analysis of transcriptomic data identifies*  
482 *ageing has distinct and opposite effects on tendon in males and females*.  
483 Scientific Reports, 2017. **7**(1): p. 14443.
- 484 27. Steinbusch, M.M., et al., *Serum snoRNAs as biomarkers for joint ageing and*  
485 *post traumatic osteoarthritis*. Scientific Reports, 2017. **7**: p. 43558.
- 486 28. Martin, M., *Cutadapt removes adapter sequences from high-throughput*  
487 *sequencing reads*. EMBnet. journal, 2011. **17**(1): p. 10-12.
- 488 29. Kim, D., et al., *TopHat2: accurate alignment of transcriptomes in the presence*  
489 *of insertions, deletions and gene fusions*. Genome biology, 2013. **14**(4): p.  
490 R36.

- 491 30. Anders, S., P.T. Pyl, and W. Huber, *HTSeq—a Python framework to work with*  
492 *high-throughput sequencing data*. *Bioinformatics*, 2015. **31**(2): p. 166-169.
- 493 31. Anders, S. and W. Huber, *Differential expression analysis for sequence count*  
494 *data* *Genome Biology*. 11: R106. doi: 10.1186/gb-2010-11-10-r106 View  
495 *Article PubMed*. 2010, NCBI.
- 496 32. Benjamini, Y. and Y. Hochberg, *Controlling the false discovery rate: a*  
497 *practical and powerful approach to multiple testing*. *Journal of the Royal*  
498 *statistical society: series B (Methodological)*, 1995. **57**(1): p. 289-300.
- 499 33. Chen, J., et al., *ToppGene Suite for gene list enrichment analysis and*  
500 *candidate gene prioritization*. *Nucleic acids research*, 2009. **37**(suppl\_2): p.  
501 W305-W311.
- 502 34. Supek, F., et al., *REVIGO summarizes and visualizes long lists of gene*  
503 *ontology terms*. *PLoS one*, 2011. **6**(7): p. e21800.
- 504 35. Shannon, P., et al., *Cytoscape: a software environment for integrated models*  
505 *of biomolecular interaction networks*. *Genome research*, 2003. **13**(11): p.  
506 2498-2504.
- 507 36. Xia, J., et al., *MetaboAnalyst: a web server for metabolomic data analysis and*  
508 *interpretation*. *Nucleic acids research*, 2009. **37**(suppl\_2): p. W652-W660.
- 509 37. Hawker, G.A., *Osteoarthritis is a serious disease*. *Clin Exp Rheumatol*, 2019.  
510 **37**(120): p. S3-S6.
- 511 38. Friel, N.A. and C.R. Chu, *The role of ACL injury in the development of*  
512 *posttraumatic knee osteoarthritis*. *Clinics in sports medicine*, 2013. **32**(1): p. 1-  
513 12.
- 514 39. Peffers, M., P. Balaskas, and A. Smagul, *Osteoarthritis year in review 2017:*  
515 *genetics and epigenetics*. *Osteoarthritis and cartilage*, 2018. **26**(3): p. 304-  
516 311.
- 517 40. Malemud, C.J., *MicroRNAs and osteoarthritis*. *Cells*, 2018. **7**(8): p. 92.
- 518 41. Endisha, H., et al., *The complex landscape of microRNAs in articular*  
519 *cartilage: biology, pathology, and therapeutic targets*. *JCI insight*, 2018. **3**(17).
- 520 42. Lieberthal, J., N. Sambamurthy, and C.R. Scanzello, *Inflammation in joint*  
521 *injury and post-traumatic osteoarthritis*. *Osteoarthritis and cartilage*, 2015.  
522 **23**(11): p. 1825-1834.
- 523 43. Liu, Y., et al., *Exosomal KLF3-AS1 from hMSCs promoted cartilage repair and*  
524 *chondrocyte proliferation in osteoarthritis*. *Biochemical Journal*, 2018. **475**(22):  
525 p. 3629-3638.
- 526 44. Remst, D.F., E.N. Blaney Davidson, and P.M. van der Kraan, *Unravelling*  
527 *osteoarthritis-related synovial fibrosis: a step closer to solving joint stiffness*.  
528 *Rheumatology*, 2015. **54**(11): p. 1954-1963.

- 529 45. Jeon, O.H., et al., *Senescent cells and osteoarthritis: a painful connection*.  
530 The Journal of clinical investigation, 2018. **128**(4): p. 1229-1237.
- 531 46. Davidson Blaney, E., P. van der Kraan, and W. van den Berg, *TGF-beta and*  
532 *osteoarthritis*. Osteoarthritis Cartilage, 2007. **15**: p. 597-604.
- 533 47. Zisakis, A., et al., *Expression of Retinoic Acid Receptor (RAR)  $\alpha$  Protein in the*  
534 *Synovial Membrane from Patients with Osteoarthritis and Rheumatoid*  
535 *Arthritis*. International journal of biomedical science: IJBS, 2007. **3**(1): p. 46.
- 536 48. Li, X.-F., et al., *Functional role of PPAR- $\gamma$  on the proliferation and migration of*  
537 *fibroblast-like synoviocytes in rheumatoid arthritis*. Scientific reports, 2017.  
538 **7**(1): p. 1-13.
- 539 49. Yang, H., et al., *CRISPR/Cas9-mediated genome editing efficiently creates*  
540 *specific mutations at multiple loci using one sgRNA in Brassica napus*.  
541 Scientific reports, 2017. **7**(1): p. 1-13.
- 542 50. Heraud, F., A. Heraud, and M. Harmand, *Apoptosis in normal and*  
543 *osteoarthritic human articular cartilage*. Annals of the rheumatic diseases,  
544 2000. **59**(12): p. 959-965.
- 545 51. Li, H., C. Chen, and S. Chen, *Posttraumatic knee osteoarthritis following*  
546 *anterior cruciate ligament injury: Potential biochemical mediators of*  
547 *degenerative alteration and specific biochemical markers*. Biomedical reports,  
548 2015. **3**(2): p. 147-151.
- 549 52. Ashraf, S. and D.A. Walsh, *Angiogenesis in osteoarthritis*. Current opinion in  
550 rheumatology, 2008. **20**(5): p. 573-580.
- 551 53. Ripmeester, E.G., et al., *Recent insights into the contribution of the changing*  
552 *hypertrophic chondrocyte phenotype in the development and progression of*  
553 *osteoarthritis*. Frontiers in bioengineering and biotechnology, 2018. **6**: p. 18.
- 554 54. Goldring, M.B. and K.B. Marcu, *Epigenomic and microRNA-mediated*  
555 *regulation in cartilage development, homeostasis, and osteoarthritis*. Trends  
556 in molecular medicine, 2012. **18**(2): p. 109-118.
- 557 55. Burrage, P.S., K.S. Mix, and C.E. Brinckerhoff, *Matrix metalloproteinases: role*  
558 *in arthritis*. Front Biosci, 2006. **11**(1): p. 529-543.
- 559 56. Sahebjam, S., R. Khokha, and J.S. Mort, *Increased collagen and aggrecan*  
560 *degradation with age in the joints of Timp3<sup>-/-</sup> mice*. Arthritis & Rheumatism,  
561 2007. **56**(3): p. 905-909.
- 562 57. Zhong, L., et al., *Correlation between gene expression and osteoarthritis*  
563 *progression in human*. International journal of molecular sciences, 2016.  
564 **17**(7): p. 1126.
- 565 58. Douglas, M., J. Hutchison, and A. Sutherland, *Anterior cruciate ligament*  
566 *integrity in osteoarthritis of the knee in patients undergoing total knee*  
567 *replacement*. Journal of Orthopaedics and Traumatology, 2010. **11**(3): p. 149.

- 568 59. Dieci, G., M. Preti, and B. Montanini, *Eukaryotic snoRNAs: a paradigm for*  
569 *gene expression flexibility*. Genomics, 2009. **94**(2): p. 83-88.
- 570 60. Kishore, S., et al., *Insights into snoRNA biogenesis and processing from PAR-*  
571 *CLIP of snoRNA core proteins and small RNA sequencing*. Genome biology,  
572 2013. **14**(5): p. R45.
- 573 61. Jorjani, H., et al., *An updated human snoRNAome*. Nucleic acids research,  
574 2016. **44**(11): p. 5068-5082.
- 575 62. Khanna, A. and S. Stamm, *Regulation of alternative splicing by short non-*  
576 *coding nuclear RNAs*. rNA Biology, 2010. **7**(4): p. 480-485.
- 577 63. Michel, C.I., et al., *Small nucleolar RNAs U32a, U33, and U35a are critical*  
578 *mediators of metabolic stress*. Cell metabolism, 2011. **14**(1): p. 33-44.
- 579 64. Huang, C., et al., *A snoRNA modulates mRNA 3' end processing and*  
580 *regulates the expression of a subset of mRNAs*. Nucleic acids research, 2017.  
581 **45**(15): p. 8647-8660.
- 582 65. Stepanov, G.A., et al., *Regulatory role of small nucleolar RNAs in human*  
583 *diseases*. BioMed research international, 2015. **2015**.
- 584 66. Montanaro, L., D. Treré, and M. Derenzini, *Nucleolus, ribosomes, and cancer*.  
585 The American journal of pathology, 2008. **173**(2): p. 301-310.
- 586 67. Zhang, L., et al., *Serum non-coding RNAs as biomarkers for osteoarthritis*  
587 *progression after ACL injury*. Osteoarthritis and cartilage, 2012. **20**(12): p.  
588 1631-1637.
- 589 68. Xu, G., et al., *Small nucleolar RNA 113-1 suppresses tumorigenesis in*  
590 *hepatocellular carcinoma*. Molecular cancer, 2014. **13**(1): p. 216.
- 591 69. Mao, L.-H., et al., *LncRNA-LALR1 upregulates small nucleolar RNA*  
592 *SNORD72 to promote growth and invasion of hepatocellular carcinoma*. Aging  
593 (Albany NY), 2020. **12**(5): p. 4527.
- 594 70. Lyden, D., et al., *Id1 and Id3 are required for neurogenesis, angiogenesis and*  
595 *vascularization of tumour xenografts*. Nature, 1999. **401**(6754): p. 670-677.
- 596 71. Benezra, R., et al., *A Negative Regulator of Helix-Loop-Helix DNA Binding*  
597 *Proteins: Control of Terminal Myogenic Differentiation*. Annals of the New  
598 York Academy of Sciences, 1990. **599**(1): p. 1-11.
- 599 72. Edhayan, G., et al., *Inflammatory properties of inhibitor of DNA binding 1*  
600 *secreted by synovial fibroblasts in rheumatoid arthritis*. Arthritis research &  
601 therapy, 2016. **18**(1): p. 87.
- 602 73. Gong, J., et al., *A pan-cancer analysis of the expression and clinical*  
603 *relevance of small nucleolar RNAs in human cancer*. Cell reports, 2017. **21**(7):  
604 p. 1968-1981.
- 605 74. Sharma, E., et al., *Global mapping of human RNA-RNA interactions*.  
606 Molecular cell, 2016. **62**(4): p. 618-626.

- 607 75. Xing, Y.-H., et al., *SLERT regulates DDX21 rings associated with Pol I*  
608 *transcription*. *Cell*, 2017. **169**(4): p. 664-678. e16.
- 609 76. Saprashvili, Z., et al., *The noncoding RNAs SNORD50A and SNORD50B bind*  
610 *K-Ras and are recurrently deleted in human cancer*. *Nature genetics*, 2016.  
611 **48**(1): p. 53.
- 612 77. Stijak, L., et al., *The influence of sex hormones on anterior cruciate ligament*  
613 *rupture: female study*. *Knee Surgery, Sports Traumatology, Arthroscopy*,  
614 2015. **23**(9): p. 2742-2749.

615

616

617

618

619 **Table 1.** Differentially expressed miRs with the highest and lowest log2 fold-change  
620 when comparing from control versus diseased OA anterior cruciate ligament (ACL).

621

| miR                                                       | Log2 change | fold-<br>FDR adjusted<br>p-values |
|-----------------------------------------------------------|-------------|-----------------------------------|
| <b>Genes with increased expression in diseased OA ACL</b> |             |                                   |
| hsa-miR-5100                                              | 3.75        | 6.2E-07                           |
| hsa-miR-31-5p                                             | 3.14        | 6.9E-15                           |
| hsa-miR-129-5p                                            | 2.42        | 4.0E-03                           |
| hsa-miR-144-3p                                            | 2.41        | 3.5E-04                           |
| hsa-miR-486-5p                                            | 2.33        | 3.2E-04                           |
| hsa-miR-370-3p                                            | 2.32        | 1.4E-06                           |
| hsa-miR-543                                               | 2.20        | 6.3E-03                           |
| hsa-miR-4521                                              | 2.19        | 5.1E-04                           |
| hsa-miR-493-5p                                            | 2.17        | 6.7E-04                           |
| hsa-miR-411-3p                                            | 2.16        | 3.9E-03                           |
| <b>Genes with reduced expression in control ACL</b>       |             |                                   |
| hsa-miR-206                                               | -6.13       | 1.9E-06                           |
| hsa-miR-12136                                             | -4.35       | 3.3E-18                           |
| hsa-miR-3182                                              | -3.20       | 3.8E-10                           |
| hsa-miR-101-5p                                            | -2.22       | 9.6E-03                           |
| hsa-miR-338-3p                                            | -2.08       | 1.5E-02                           |
| hsa-miR-335-5p                                            | -2.03       | 7.3E-03                           |
| hsa-miR-190b-5p                                           | -1.98       | 2.5E-03                           |
| hsa-miR-29c-3p                                            | -1.89       | 1.1E-02                           |
| hsa-miR-103a-5p                                           | -1.86       | 3.7E-06                           |
| hsa-miR-30b-5p                                            | -1.81       | 1.7E-02                           |

622

623

624

625

626

627



628 **Table 2.** Small-non coding RNAs (small nucleolar RNAs (snoRNAs) and small nuclear  
 629 RNA (sncRNA) identified as differentially expressed between control and anterior  
 630 cruciate ligaments (ACLs) derived from osteoarthritic joints.

| Name     | Family      | Action                                                                                 | Log2 fold-change | FDR adjusted p-value | Higher         |
|----------|-------------|----------------------------------------------------------------------------------------|------------------|----------------------|----------------|
| SNORD114 | C/D BOX     | Site-specific 2'-O-methylation                                                         | 3.60             | 4.7E-07              | OA<br>ACL      |
| SNORD113 | C/D BOX     | Site-specific 2'-O-methylation                                                         | 2.85             | 9.8E-05              | OA<br>ACL      |
| RNU6     | Spliceosome | Complex of snRNA and protein subunits that removes introns from a transcribed pre-mRNA | 2.85             | 4.8E-03              | OA<br>ACL      |
| SNORD72  | C/D BOX     | Site-specific 2'-O-methylation                                                         | 1.83             | 4.2E-02              | OA<br>ACL      |
| RNVU1-19 | Spliceosome | Complex of snRNA and protein subunits that removes introns from a transcribed pre-mRNA | 1.58             | 4.8E-02              | OA<br>ACL      |
| RNU7-19P | Spliceosome | Complex of snRNA and protein subunits that removes introns from a transcribed pre-mRNA | -7.61            | 4.0E-07              | Control<br>ACL |
| RNU4-59P | Spliceosome | Complex of snRNA and protein subunits that removes introns from a transcribed pre-mRNA | -4.90            | 1.4E-33              | Control<br>ACL |
| SNORA36B | H/ACA box   | H/ACA family of pseudouridylation guide snoRNAs                                        | -4.25            | 2.7E-06              | Control<br>ACL |
| SNORA53  | H/ACA box   | H/ACA family of pseudouridylation guide snoRNAs                                        | -3.68            | 5.1E-15              | Control<br>ACL |
| SNORA73B | H/ACA box   | H/ACA family of pseudouridylation guide snoRNAs                                        | -3.61            | 3.9E-05              | Control<br>ACL |

631

632

633 **Table 3.** Top canonical pathways for target mRNAs of differentially expressed miRNAs  
634 in diseased OA anterior cruciate ligaments (ACLs).

| 635 | <b>Name</b>                                            | <b>p-value</b> | <b>Overlap</b> |
|-----|--------------------------------------------------------|----------------|----------------|
| 636 | Hepatic Fibrosis Signalling Pathway                    | 1.62E-33       | 15.8 %         |
| 637 |                                                        |                |                |
| 638 | Hepatic Fibrosis/Hepatic Stellate Cell Activation      | 3.06E-32       | 23.1 %         |
| 639 |                                                        |                |                |
| 640 | Cardiac Hypertrophy Signalling                         | 1.28E-28       | 12.3 %         |
| 641 |                                                        |                |                |
| 642 | Colorectal Cancer Metastasis Signalling                | 1.97E-27       | 17.4 %         |
| 643 |                                                        |                |                |
| 644 | Role of Macrophages, Fibroblasts and Endothelial Cells | 2.32E-27       | 15.4 %         |
| 645 |                                                        |                |                |

646

647 **Table 4.** Top upstream regulators of differentially expressed miRNAs in diseased OA  
648 anterior cruciate ligaments (ACLs).

| 649 | <b>Name</b>                   | <b>p-value</b> |
|-----|-------------------------------|----------------|
| 650 | Tumour necrosis factor        | 1.31E-101      |
| 651 | Transforming growth factor B1 | 8.50E-83       |
| 652 | lipopolysaccharide            | 1.14E-81       |
| 653 | Interleukin 1B                | 1.45E-77       |
| 654 | tretinoin                     | 9.26E-77       |

## **Figure legends**

**Figure 1. Overview of HiSeq transcriptomics data between control and diseased osteoarthritic (OA) human anterior cruciate ligament (ACL).** A. Categories of RNAs identified in control and diseased OA ACL B) Principle component analysis revealed that small non-coding RNAs (sncRNA) between control and diseased ACL were distinctly grouped. C) Volcano plot demonstrate significant (FDR< 0.05) differentially expressed sncRNAs (red dots) with a fold-change of 1.4. D. Heatmap representation of the small non-coding RNA reads from control to OA ACL. Columns refer to the control and OA ACL samples and rows of miRNAs identified with their Ensembl identification. Heatmap was generated using log-transformed normalised read counts, normalisation was performed by EdgeR's trimmed mean of M values. The colour of each entry is determined by the number of reads, ranging from yellow (positive values) to red (negative values).

**Figure 2. Ingenuity Pathway Analysis (IPA) derived functions of differentially expressed microRNAs in diseased osteoarthritic (OA) anterior cruciate ligament (ACL).** A. IPA identified that cellular functions differentiation of muscle, inflammation, proliferation, cell viability and fibrosis were associated with the differentially expressed microRNAs. Figures are graphical representations between molecules identified in our data in their respective networks. Red nodes, upregulated in OA, and green nodes, downregulated gene expression in OA. Intensity of colour is related to higher fold-change. Legends to the main features in the networks are shown. Functions colour is dependent on whether it is predicted to be activated or inhibited. B. Top network identified with canonical pathways overlaid for fibrosis, senescence, TGF $\beta$  signalling, RAR activation and PPAR/RXR activation.

**Figure 3. Osteoarthritis pathway targeted by predicted mRNA.** The canonical pathway for osteoarthritis signalling was highly ranked ( $p=2.33 \times 10^{-23}$ ) using target mRNAs identified in Ingenuity Pathway Analysis (IPA) TargetsCan from the differentially expressed miRNAs in diseased anterior cruciate ligaments (ACLs) derived from OA patients. The pathway was generated using IPA.

**Figure 4. Top-scoring networks derived from the 529 putative mRNAs differentially expressed in anterior cruciate ligaments (ACLs) derived from osteoarthritic (OA) joints.** Ingenuity pathway analysis (IPA) identified A. 'Cellular development, movement and genes expression' with a scores of 41. (B) 'Inflammatory disease, organismal injuries and abnormalities' with a score of 35 and within this network are molecules linked to their respective canonical pathways. Both are overlaid with pertinent significant biological functions contained in the gene sets. Figures are graphical representations between molecules identified in our data and predicted mRNA targets in their respective networks. Green nodes, downregulated in ACLs from OA joints; red nodes, upregulated gene expression in ACLs from OA joints. Intensity of colour is related to higher fold-change. Key to the main features in the networks is shown.

**Figure 5. Gene ontology (GO) biological processes associated with dysregulated microRNAs targets were identified following TargetScan filter module using IPA.** GO terms for biological process (FDR < 0.05) were summarized with ToppGene and visualised using REViGO and Cytoscape. Boxes represent the main clusters of biological processes that were significantly influenced by dysregulated micrRNAs between control and diseased osteoarthritic (OA) anterior cruciate ligaments (ACLs).

## **Supplementary Figures and Tables:**

**Supplementary Figure 1.** Age groups between control anterior cruciate ligament (ACL) samples and diseased OA ACL samples.

**Supplementary Figure 2.** Heatmap representation of the differentially expressed snoRNAs and sncRNAs small non-coding RNA reads from control to OA anterior cruciate ligament (ACL)

**Supplementary Table 1.** Donors' age, gender and ethnicity information.

**Supplementary Table 2.** Differentially expressed sncRNAs between control and OA anterior cruciate ligament (ACL) samples with FDR<0.05 and reads greater than 10 counts per million (CPM).

**Supplementary Table 3.** Ingenuity Pathway Analysis (IPA) of differentially expressed microRNAs target genes between control and OA anterior cruciate ligament (ACL) and IPA of mRNA core analysis of putative mRNAs targets

**Supplementary Table 4.** Gene ontology (GO) of the top biological processes gene ontology of putative mRNA targets between control and OA anterior cruciate ligament (ACL) summarised in REViGO tool.

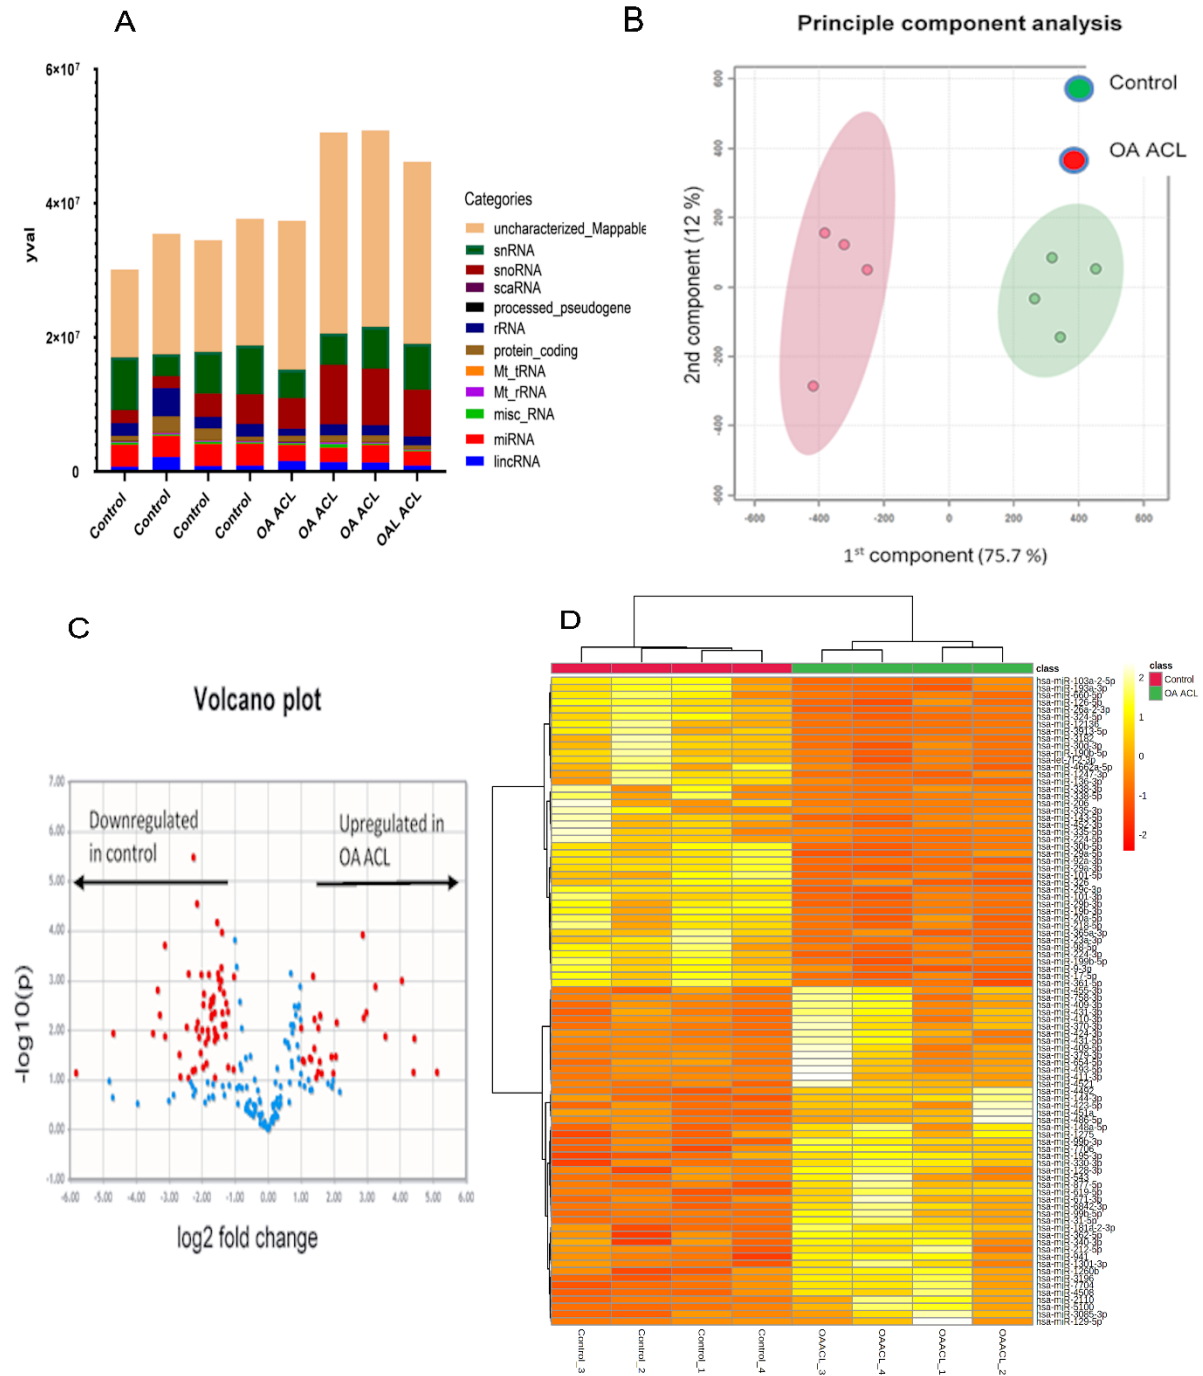

**Figure 1.**

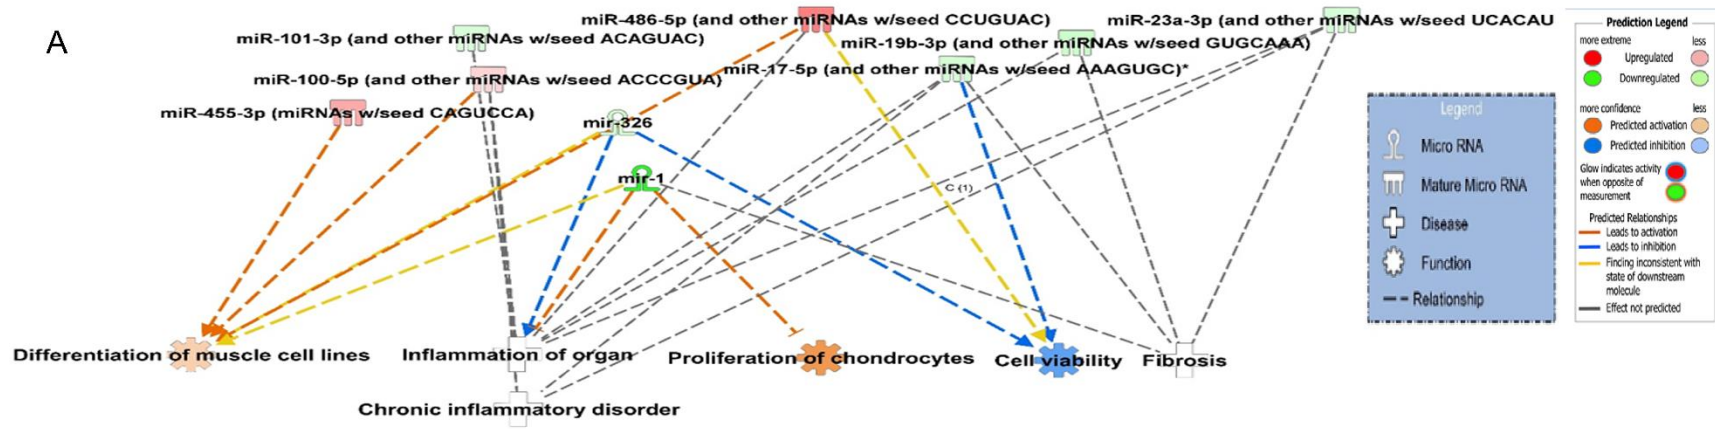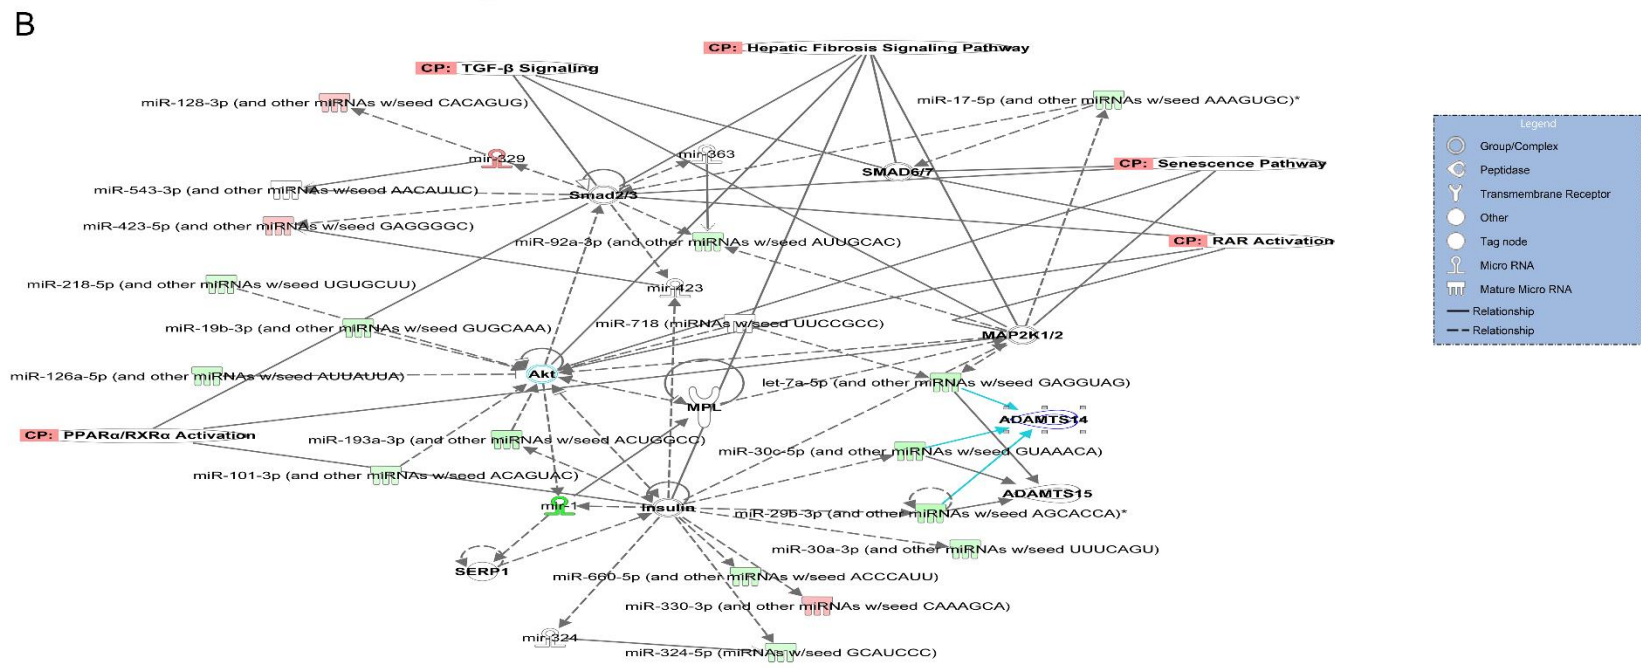

Figure 2.



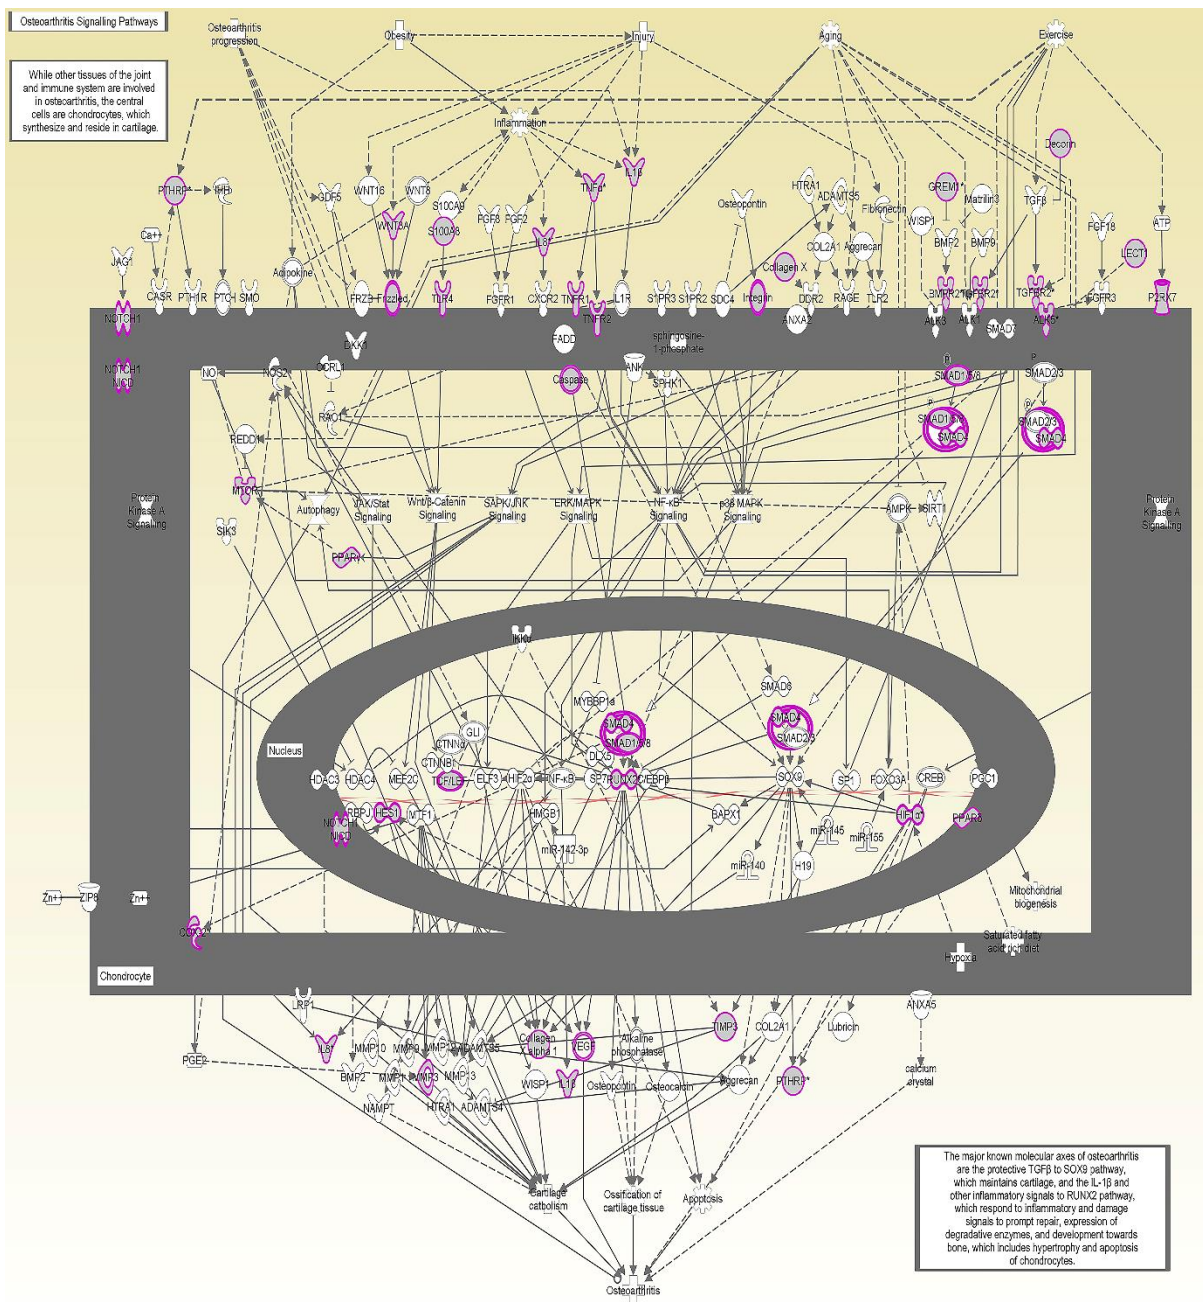

**Figure 3.**

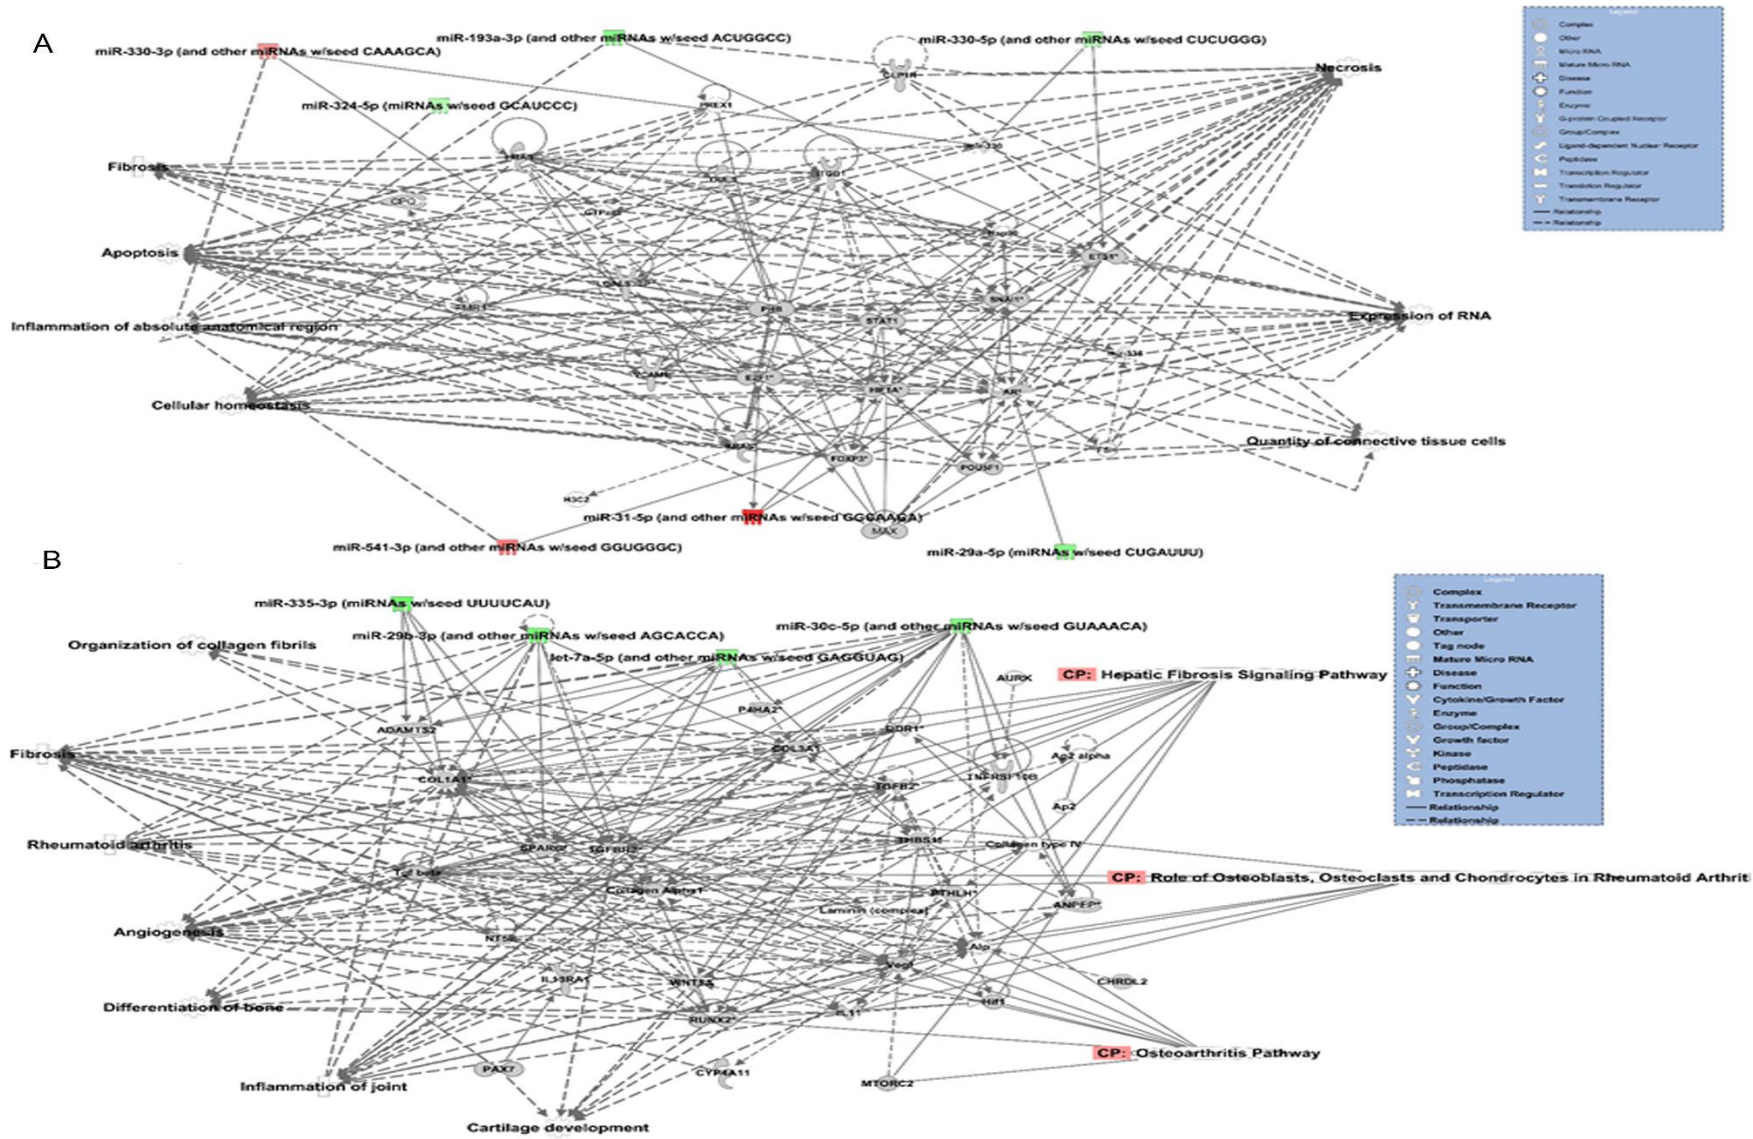

Figure 4.

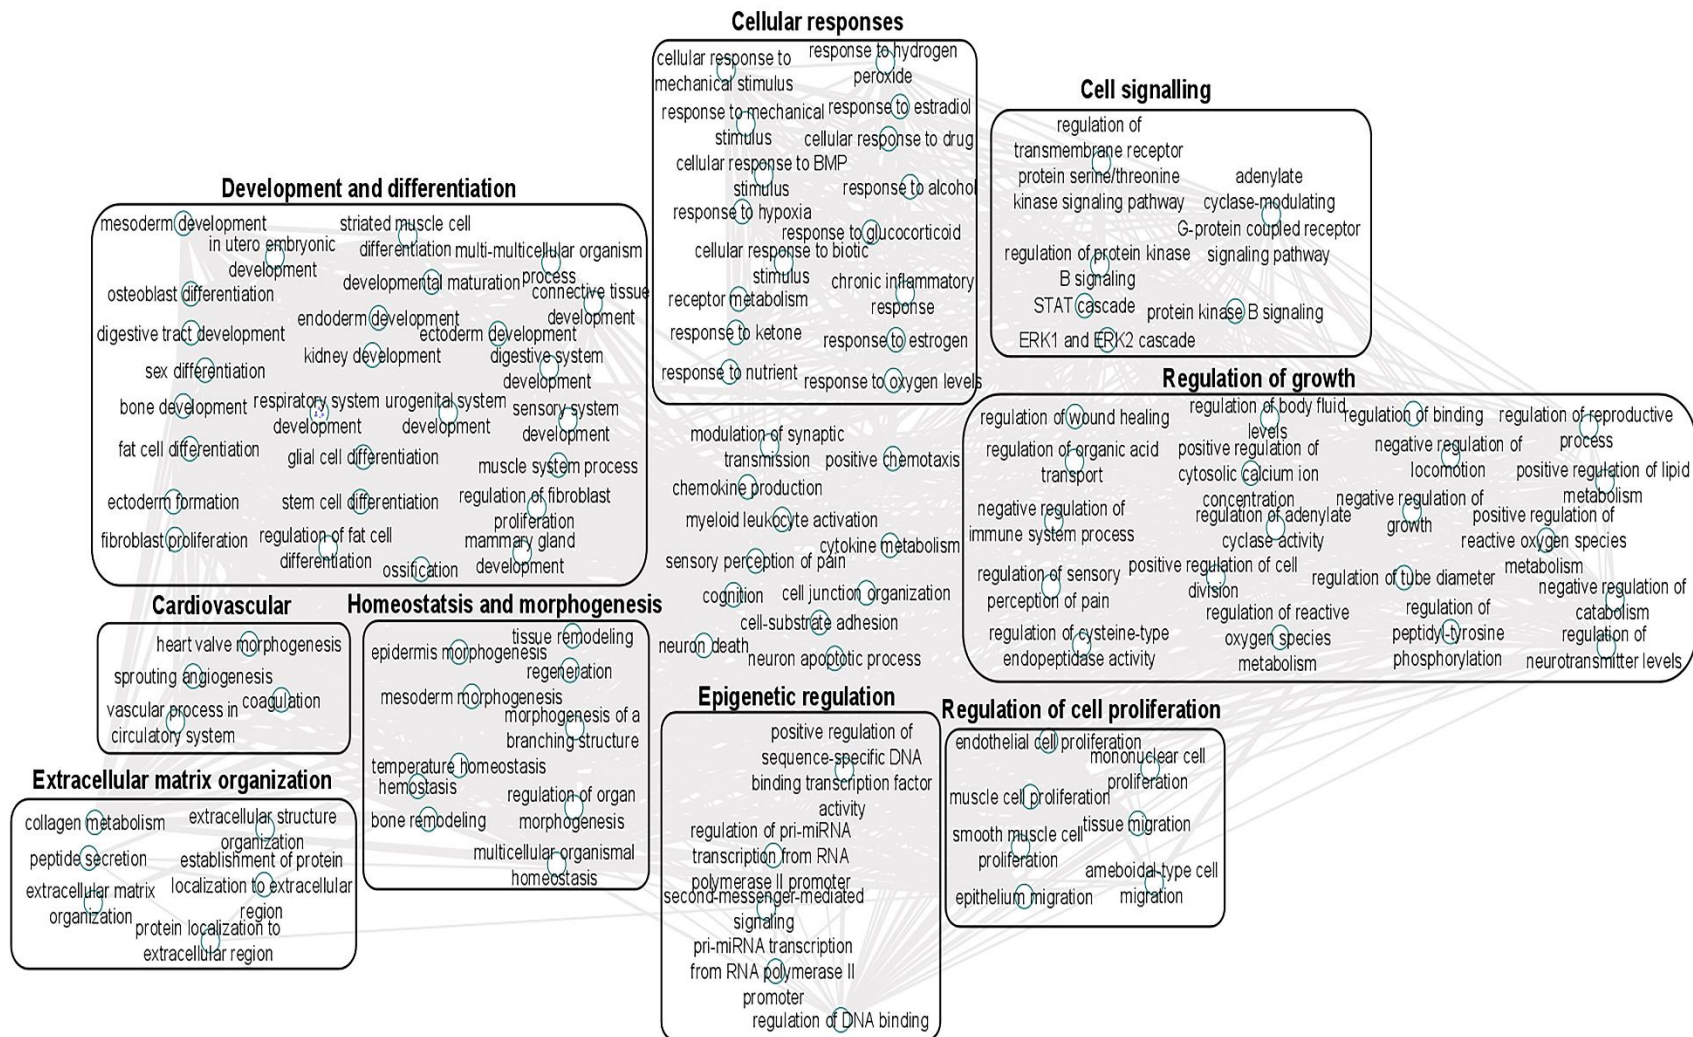

**Figure 5.**
